# Supplementary material for: Polaron hopping barriers and rates in semiconducting polymers
Source: Royal Society of Chemistry journal article supplement (doi:10.1039/c9cp06039a), 2020-01-01
Supplement: c9cp06039a1.pdf [file c9cp06039a1.pdf]

## **Supplementary Information for:**

### Polaron Hopping Barriers and Rates in Semiconducting Polymers

Joel H. Bombile, Shreya Shetty, Michael J. Janik and Scott T. Milner

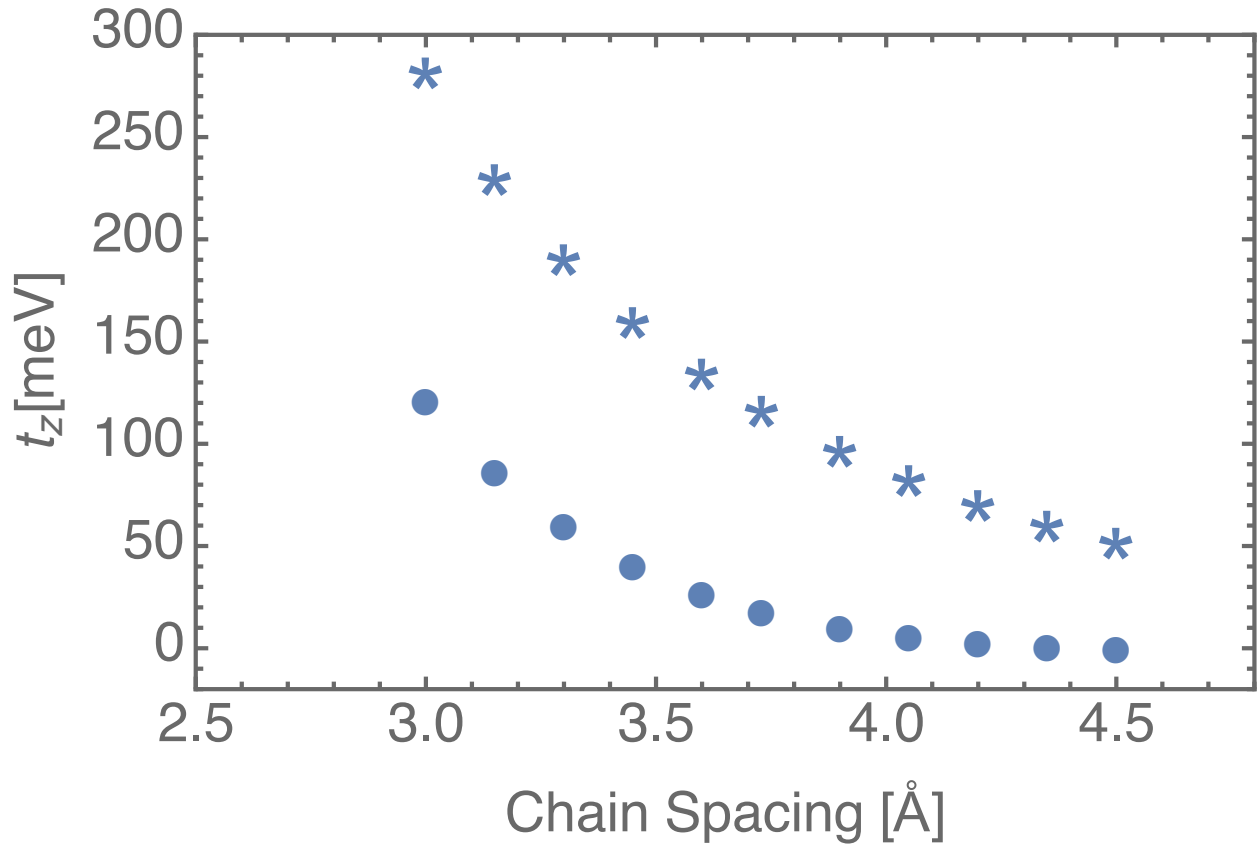

Figure S1: Hole (dot) and electron (star) interchain charge hopping integral for different interchain spacings in a P3HT crystalline lamella. The longitudinal shift is kept at 1.25 Å.

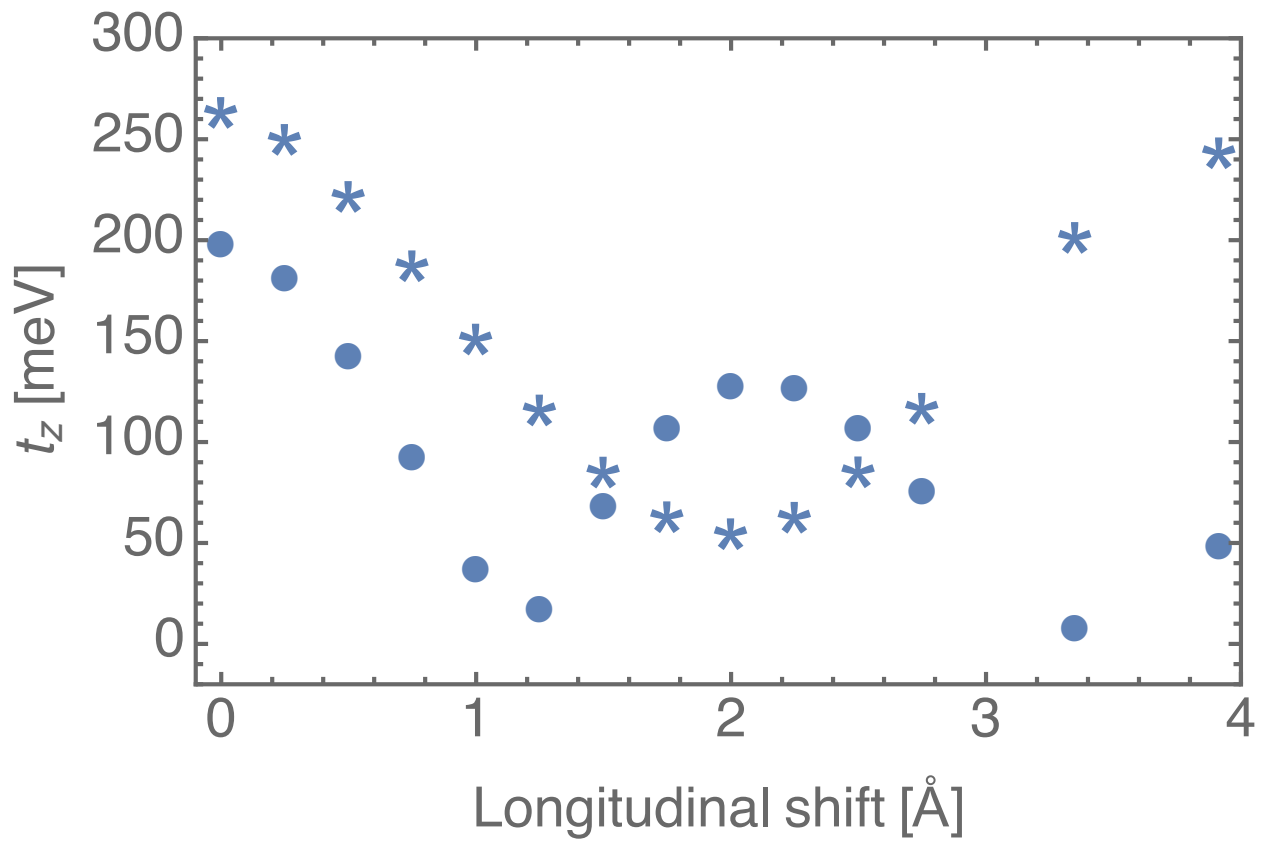

Figure S2: Hole (dot) and electron (star) interchain charge hopping integral for different values of the longitudinal shift between adjacent chains. The chain spacing is maintained at 3.73 Å.
